# Supplementary material
Source: HighWire-hosted journal article supplement (https://www.annfammed.org/highwire/filestream/8929/field_highwire_adjunct_files/0/Lucan_Supp_App.pdf)
Supplement: Lucan_Supp_App.pdf [file Lucan_Supp_App.pdf]

## Supplemental material for

Parsons A, Spurrell-Huss E, Lucan SC. How health systems can promote healthier eating. *Ann Fam Med*. 2017;15(6):583.

### Author affiliations

Amanda Parsons, MD, MBA<sup>1,2</sup>

Elizabeth Spurrell-Huss, MSW, LCSW, MPH<sup>2</sup>

Sean C. Lucan, MD, MPH, MS<sup>1,2</sup>

<sup>1</sup>Department of Family and Social Medicine, Albert Einstein College of Medicine, Bronx, New York

<sup>2</sup>Community & Population Health, Montefiore Health System, Bronx, New York

### Corresponding author

Amanda Parsons, MD, MBA

Assistant Professor, Department of Family and Social Medicine, Albert Einstein College of Medicine | Vice President, Community & Population Health, Montefiore Health System

111 East 210th street, Bronx, NY 10467

Tel 718.920.8055, Fax 718.920.8949

APARSONS@montefiore.org

**Conflicts of interest:** A.P. and E.S-H. have no conflicts to report. S.C.L and some of the research referenced in this manuscript are supported by the Eunice Kennedy Shriver National Institute of Child Health & Human Development of the National Institutes of Health under Award Number K23HD079606. The content is solely the responsibility of the authors and does not necessarily represent the official views of the National Institutes of Health.

**Figure 1. An integrated 3-pronged strategy to promote healthier foods, healthier eating, & improved health.**

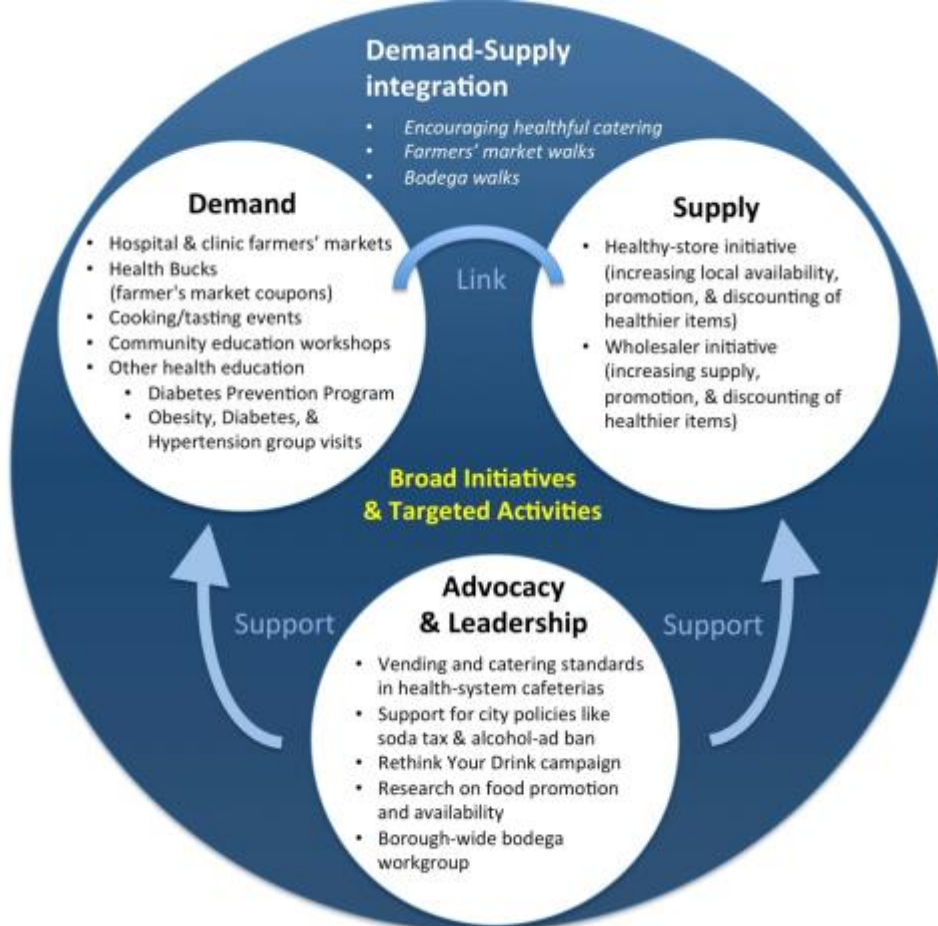

**Figure 2. Montefiore Health System’s obesity ‘hotspotting’ by Census Block Group, 2012-2013.**

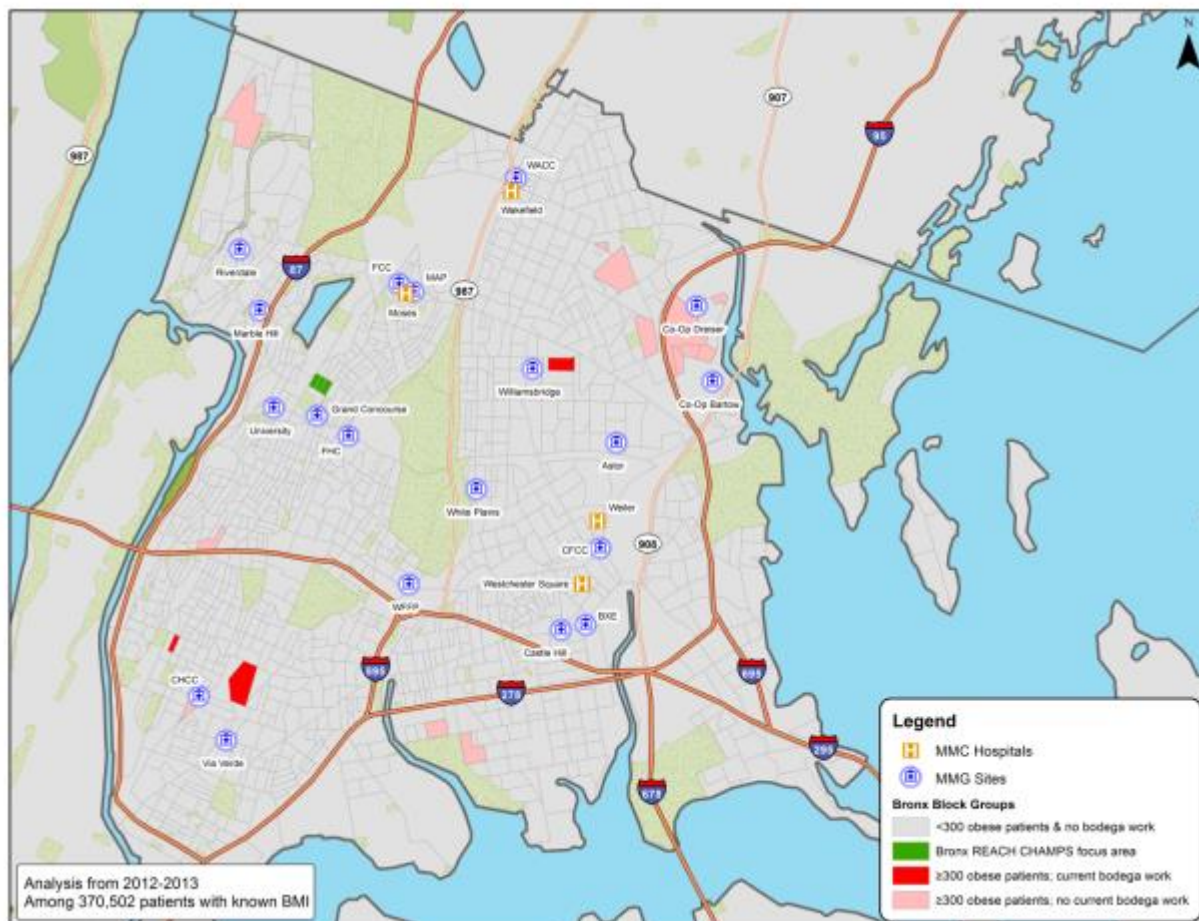

Figure 3. Adult- and kid-focused “Rethink Your Drink” poster boards used to increase awareness and dialogue in local communities about the sugar content in common beverages.

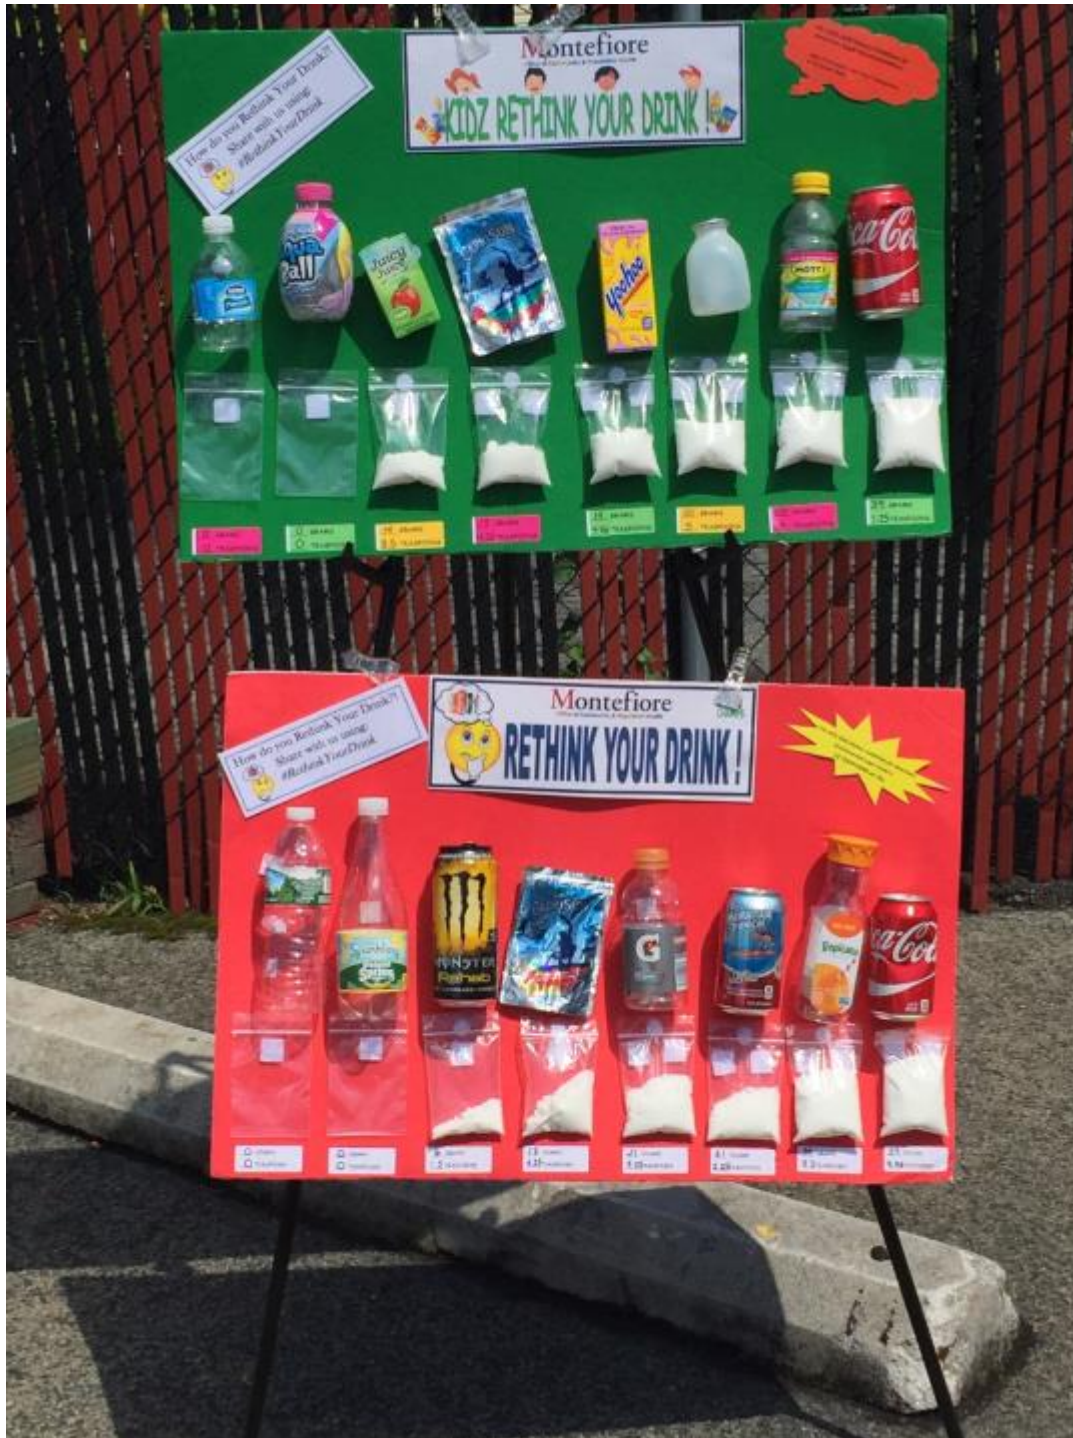

## References

1. Rehm CD, Marquez ME, Spurrell-Huss E, Hollingsworth N, Parsons AS. Lessons from Launching the Diabetes Prevention Program in a Large Integrated Health Care Delivery System: A Case Study. *Popul Health Manag.* 2017;20(4):262-270.
2. New York City Department of Health and Mental Hygiene. Health Bucks. <https://www1.nyc.gov/site/doh/health/health-topics/health-bucks.page>. Accessed July 7, 2017.
3. Centers for Disease Control and Prevention. Rethink your drink. [https://www.cdc.gov/nccdphp/dnpa/nutrition/pdf/rethink\\_your\\_drink.pdf](https://www.cdc.gov/nccdphp/dnpa/nutrition/pdf/rethink_your_drink.pdf). Accessed July 7, 2017.
4. Lucan SC, Maroko A, Shanker R, Jordan WB. Green Carts (mobile produce vendors) in the Bronx—optimally positioned to meet neighborhood fruit-and-vegetable needs? *J Urban Health.* 2011;88(5):977-981.
5. Lucan SC, Maroko AR, Bumol J, Varona M, Torrens L, Schechter CB. Mobile food vendors in urban neighborhoods-implications for diet and diet-related health by weather and season. *Health Place.* 2014;27:171-175.
6. Chambers EC, Wong BC, Riley RW, et al. Combining clinical and population-level data to understand the health of neighborhoods. *Am J Public Health.* 2015;105(3):510-512.
7. Lucan SC, Maroko AR, Sanon O, Frias R, Schechter CB. Urban farmers' markets: accessibility, offerings, and produce variety, quality, and price compared to nearby stores. *Appetite.* 2015;90:23-30.
8. Lucan SC, Maroko AR, Sanon OC, Schechter CB. Unhealthful Food-and-Beverage Advertising in Subway Stations: Targeted Marketing, Vulnerable Groups, Dietary Intake, and Poor Health. *J Urban Health.* 2017;94(2):220-232.
